# Supplementary material for: The Effect of Sodium Dodecyl Sulfate (SDS) and Cetyltrimethylammonium Bromide (CTAB) on the Properties of ZnO Synthesized by Hydrothermal Method
Source: Int J Mol Sci. 2012 Oct 16;13(10):13275–93. doi: 10.3390/ijms131013275 (PMC3497326; doi:10.3390/ijms131013275)

## Supplementary Information

**Figure S1.** TGA-DTG thermogravimetric analysis of as-synthesized ZnO samples prepared at different mole ratios of SDS:CTAB, (a) 1:0; (b) 1:0.5; (c) 1:1; (d) 1:1.5; (e) 1:2 and CTAB:SDS (f) 1:0; (g) 1:0.2; (h) 1:0.36; (i) 1:0.5; (j) 1:1 and (k) 1:1.5.

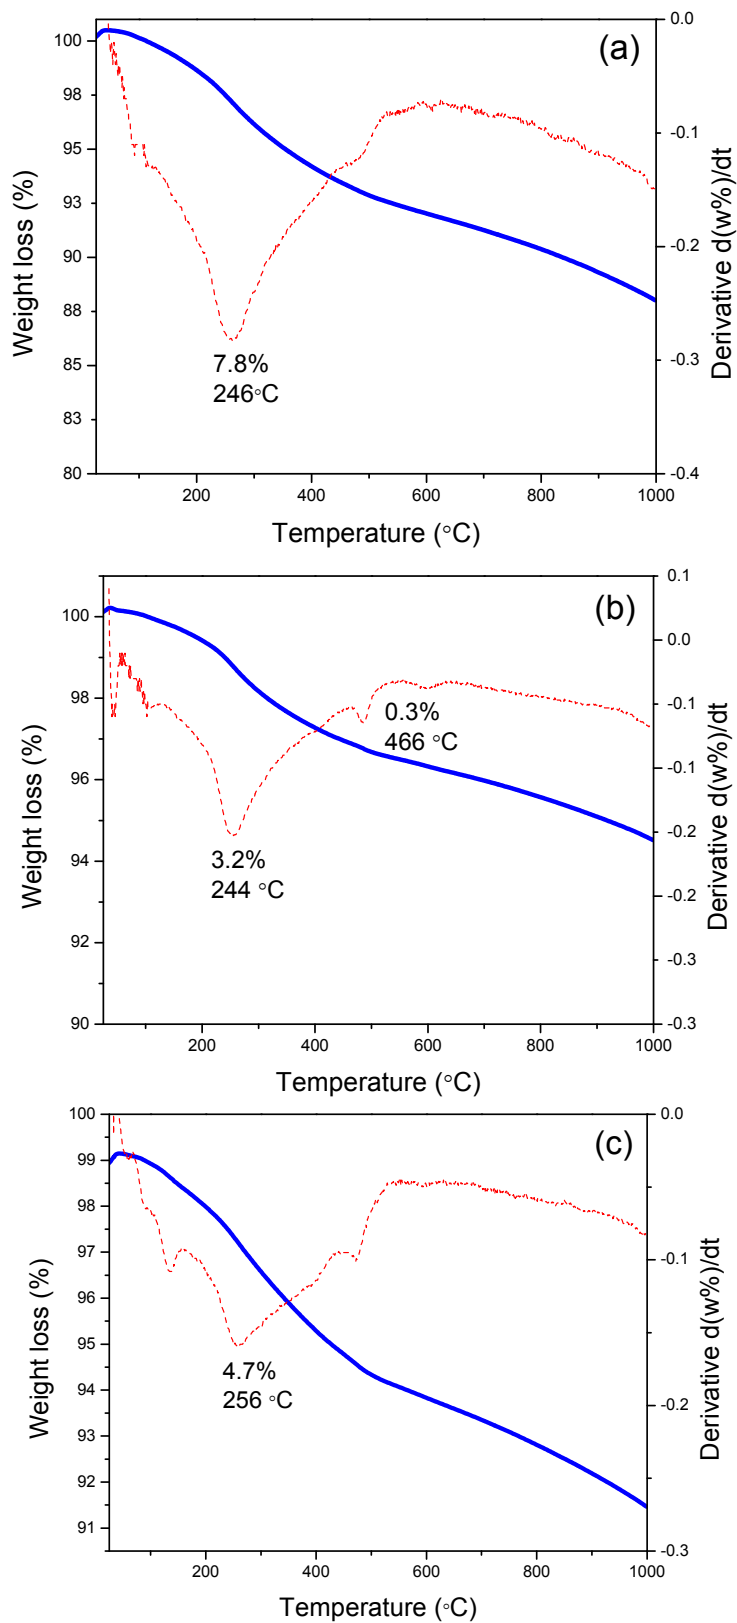

Figure S1. Cont.

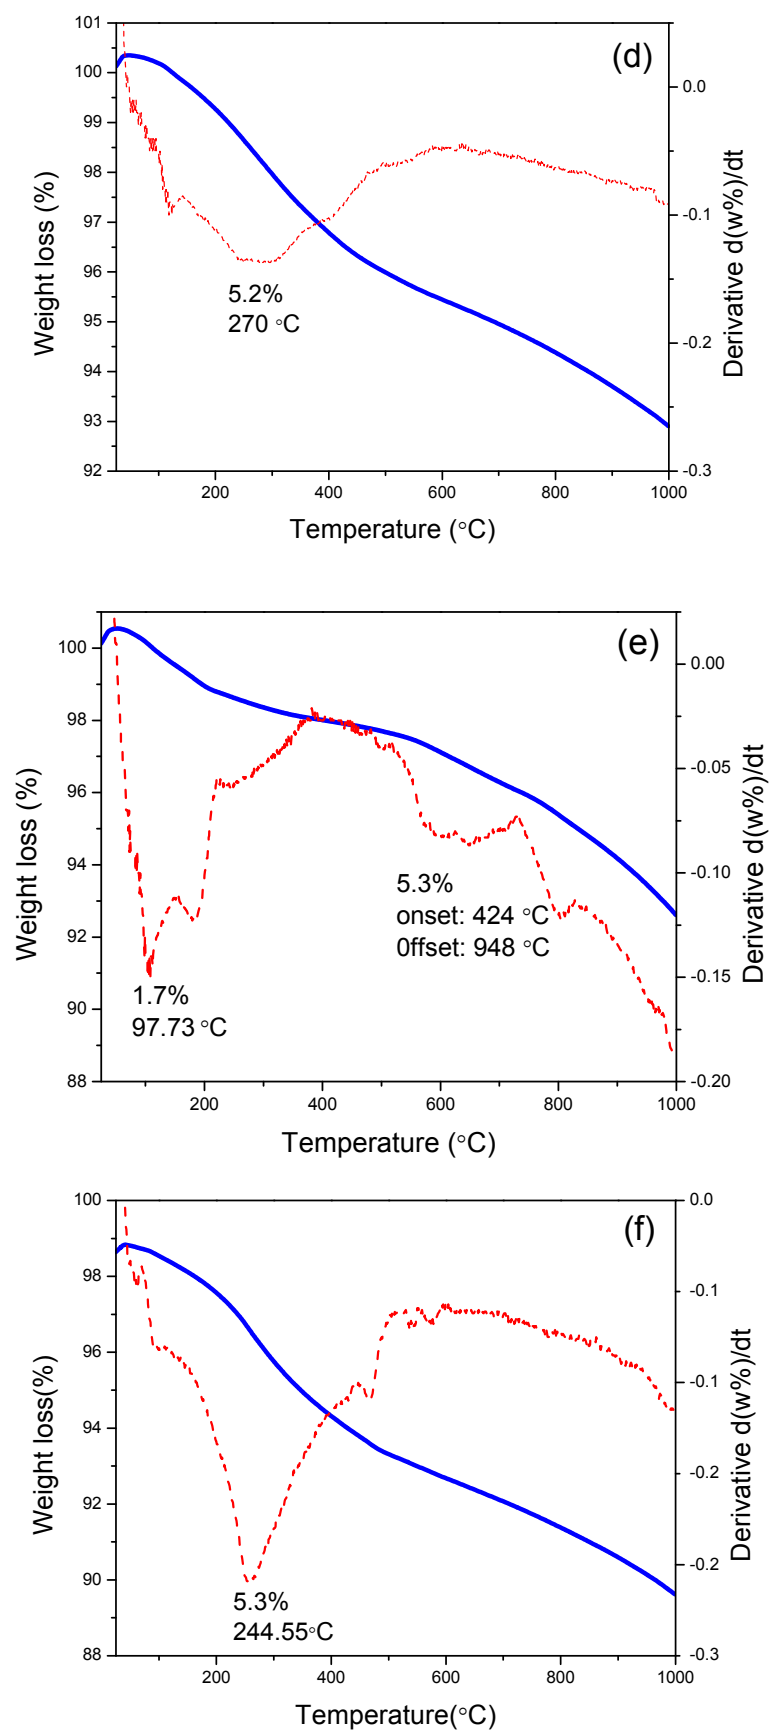

Figure S1. Cont.

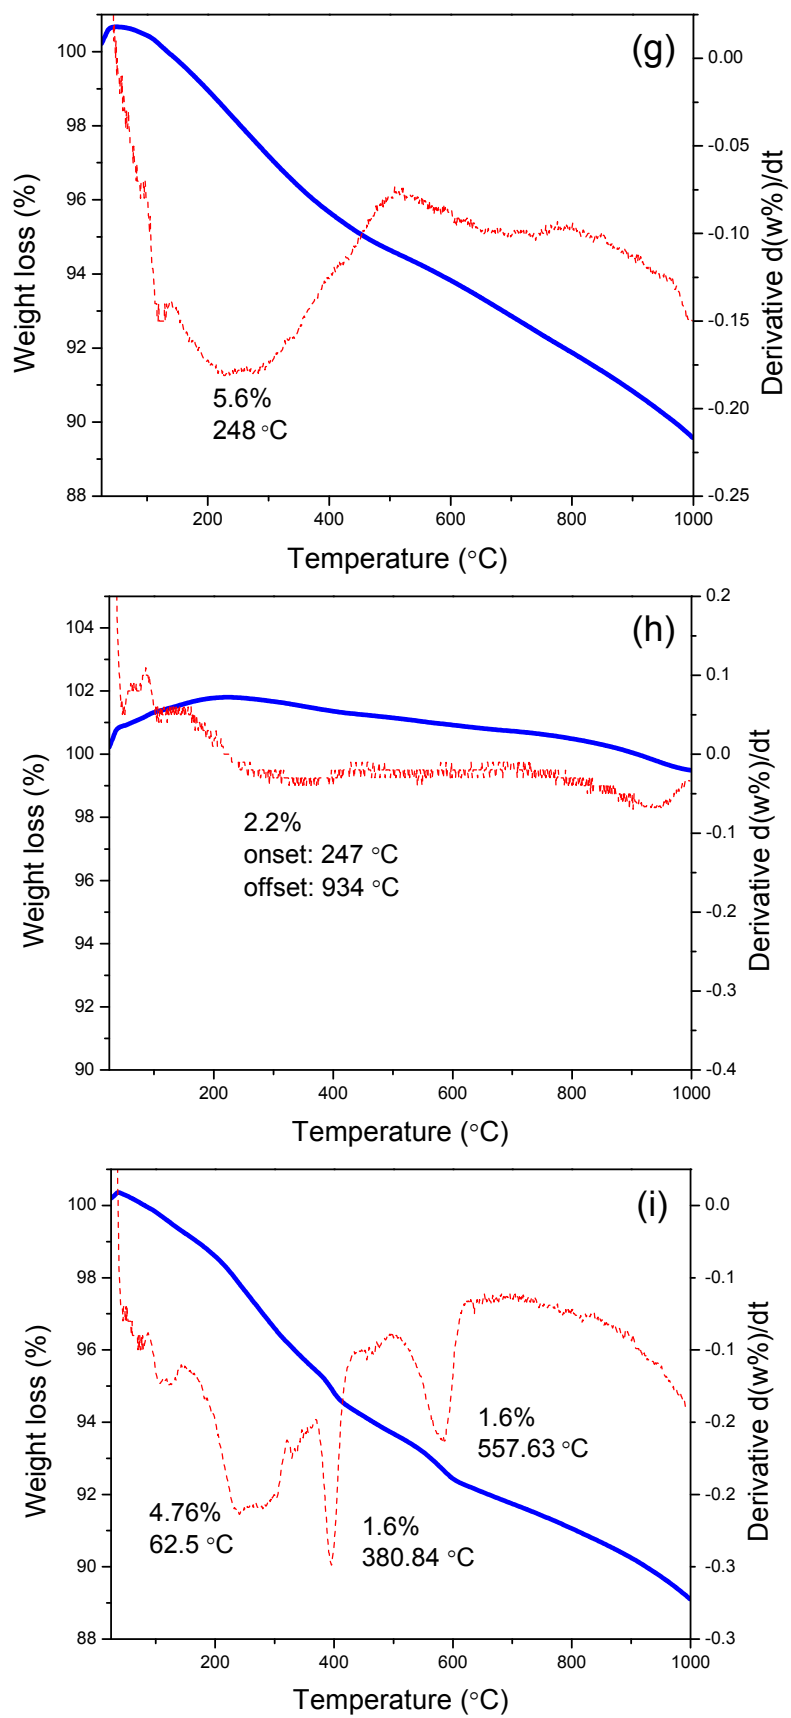

Figure S1. Cont.

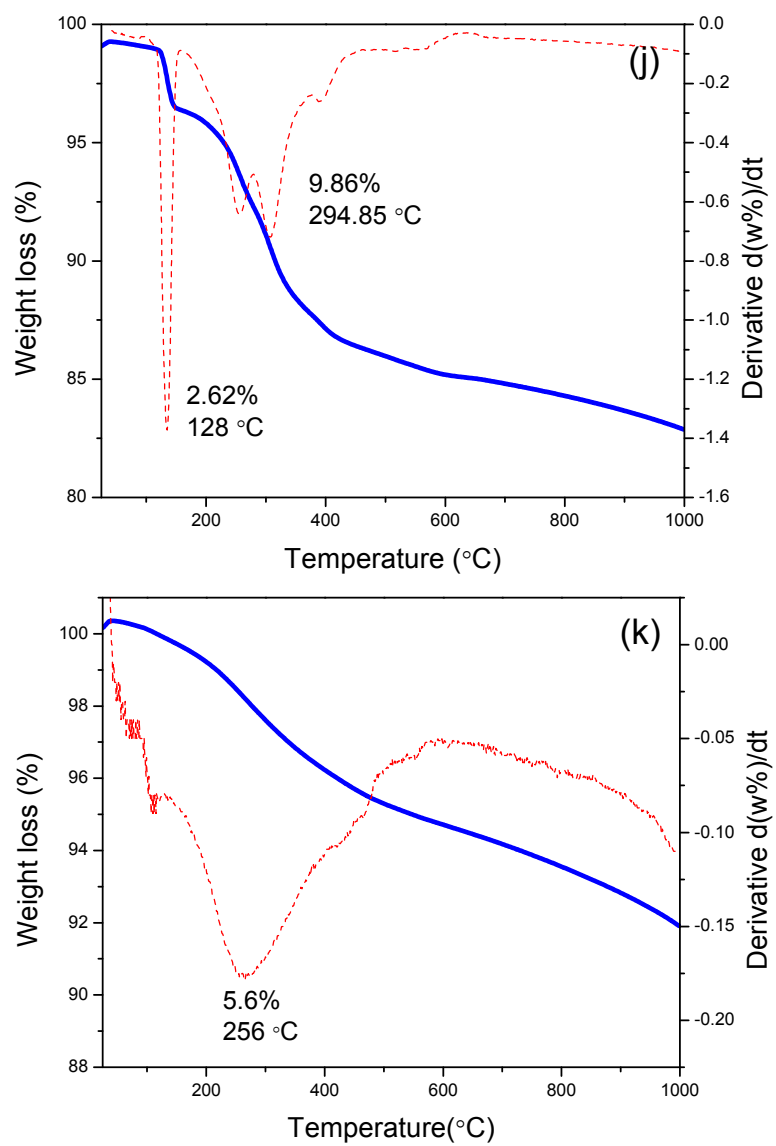

Supplement: Supplementary file 1 [file ijms-13-13275-s001.pdf]
